# Supplementary material for: Antarctic biodiversity predictions through substrate qualities and environmental DNA
Source: bioRxiv preprint, doi:10.1101/2021.08.18.456862, version 1 (2021-08-19)
Supplement: Web Figure 6 [file 456862_file09.docx]

**Web Figure 6:** Sample and ASV coverages prior to and after filtering stages.
